# Supplementary material
Source: Springer Nature journal article supplement (https://www.springermedizin.de/resource/supplementary/12936_2014_3657_MOESM2_ESM.pdf/9546120)
Supplement: MOESM2 [file 9546120]

**ADDITIONAL FILE 2**

**Table 1** Distributions and parameter values used for the probabilistic sensitivity analysis.

| Parameters                                                                                                                                                                                                                                           | Distribution*                                                                                                                 | Notes |
|------------------------------------------------------------------------------------------------------------------------------------------------------------------------------------------------------------------------------------------------------|-------------------------------------------------------------------------------------------------------------------------------|-------|
| EFFECTIVENESS                                                                                                                                                                                                                                        |                                                                                                                               |       |
| Prevalence ratio for the intervention (log scale)                                                                                                                                                                                                    | <i>Truncated Normal</i> (ln(0.81); 0.072)                                                                                     | 1     |
| DISABILITY-ADJUSTED LIFE YEARS                                                                                                                                                                                                                       |                                                                                                                               |       |
| Disability weight for infectious disease: mild                                                                                                                                                                                                       | <i>Triangular</i> (min=0.002; max=0.011)                                                                                      | 2     |
| Disability weight for infectious disease: moderate                                                                                                                                                                                                   | <i>Triangular</i> (min=0.033; max=0.081)                                                                                      | 2     |
| Disability weight for infectious disease: severe                                                                                                                                                                                                     | <i>Triangular</i> (min=0.139; max=0.298)                                                                                      | 2     |
| Disability weight for anemia: mild                                                                                                                                                                                                                   | <i>Triangular</i> (min=0.002; max=0.011)                                                                                      | 2     |
| Disability weight for anemia: moderate                                                                                                                                                                                                               | <i>Triangular</i> (min=0.038; max=0.086)                                                                                      | 2     |
| Disability weight for anemia: severe                                                                                                                                                                                                                 | <i>Triangular</i> (min=0.112; max=0.228)                                                                                      | 2     |
| Disability weight for cognitive impairments                                                                                                                                                                                                          | <i>Triangular</i> (min=0.141; max=0.314)                                                                                      | 2     |
| Duration of a malaria episode (days)                                                                                                                                                                                                                 | <i>Uniform</i> (min=14, max=28)                                                                                               | 3     |
| Duration of anemia (days)                                                                                                                                                                                                                            | <i>Uniform</i> (min=21, max=35)                                                                                               | 4     |
| TREATMENT-SEEKING BEHAVIORS                                                                                                                                                                                                                          |                                                                                                                               |       |
| Proportion seeking care at/through health facility (P <sub>HF</sub> ), community-health workers (P <sub>TSB1</sub> ), pharmacy/store (P <sub>TSB2</sub> ), traditional healers (P <sub>TSB3</sub> ), and not seeking treatment (P <sub>TSB4</sub> ). | $PS_{HF} = \text{Triangular (min=54\%; max=81\%)}$<br>$PS_{TSBi} = P_{TSBi} + [P_{TSBi} * (P_{HF} - PS_{HF}) / (1 - P_{HF})]$ | 5     |
| COSTS SAVINGS (PROVIDER)                                                                                                                                                                                                                             |                                                                                                                               |       |
| Proportion treated as out-patient (P <sub>Out</sub> )                                                                                                                                                                                                | <i>Triangular</i> (min=72%; max=95%)                                                                                          | 6     |
| Proportion diagnosed using microscopy (P <sub>Mic</sub> )                                                                                                                                                                                            | <i>Triangular</i> (min=33%; max=55%)                                                                                          | 7     |
| Costs of diagnostic with microscopy (CD <sub>Mic</sub> )                                                                                                                                                                                             | <i>Triangular</i> (min=0.45\$; max=0.75\$)                                                                                    | 7     |
| Cost of diagnostic with RDT (CD <sub>RDT</sub> )                                                                                                                                                                                                     | <i>Triangular</i> (min=0.52\$; max=4.94\$)                                                                                    | 8     |
| Outpatient's cost of treatment (CT <sub>Out</sub> )                                                                                                                                                                                                  | <i>Triangular</i> (min=1.26\$; max=5.22\$)                                                                                    | 9     |
| Inpatient's cost of diagnostic and treatment (CTD <sub>In</sub> )                                                                                                                                                                                    | <i>Triangular</i> (min=58.38\$; max=90.51\$)                                                                                  | 10    |
| COSTS SAVINGS (SOCIETY)                                                                                                                                                                                                                              |                                                                                                                               |       |
| Fee for traditional healer                                                                                                                                                                                                                           | <i>Triangular</i> (min=0.21; max=5.19)                                                                                        | 11    |
| Cost of artemether-lumefantrine at pharmacy/store                                                                                                                                                                                                    | <i>Triangular</i> (min=0.51; max=1.03)                                                                                        | 12    |
| Transportation costs to health facility/healer                                                                                                                                                                                                       | <i>Triangular</i> (min=0.20; max=0.42)                                                                                        | 13    |
| Number of days lost to malaria episode (N) and to care for children aged 10-14 years of age (N <sub>10-14</sub> )                                                                                                                                    | $N = \text{Triangular (min=2; max=5)}$<br>$N_{10-14} = N * \text{Uniform (min=20\%; max=30\%)}$                               | 14    |
| Proportion of earnings lost to anemia                                                                                                                                                                                                                | <i>Uniform</i> (min=2.5%; max=7.4%)                                                                                           | 15    |
| Proportion of earnings lost to neurological sequelae                                                                                                                                                                                                 | <i>Triangular</i> (min=10%; max=20%)                                                                                          | 16    |
| Funeral costs                                                                                                                                                                                                                                        | <i>Triangular</i> (min=30.53\$; max=50.26\$)                                                                                  | 17    |

Note: All prices are in 2012 US dollars.

\*The modes of the triangular distributions correspond to the values used to calculate the cost-effectiveness ratios.

## Notes:

- 1- Adapted from Maheu-Giroux and Castro [1]. Because it is biologically impossible for larviciding to cause an increase in malaria incidence, the normal distribution was truncated for values above the null.
- 2- The 95% confidence intervals of the disability weights reported in the 2010 GBD study were used as minimum and maximum values of the triangular distribution [2].
- 3- For the duration of malaria episodes, the same distribution as the one reported in the GBD 2010 study was used [3].
- 4- The post-malaria recovery period reported in the literature [4-6] was used and  $\pm 1$  week was added to that quantity.
- 5- Lowest and highest age-specific proportions of individual attending health facilities in the UMCP data. The other 4 treatment-seeking behaviors were rescaled such that the sum of these proportions would still be equal to 1.  $PS_{TSBi}$  refers to the re-sampled proportion whereas  $P_{TSBi}$  refers to the values described in Table 5.
- 6- Minimum for severe malaria is reported in Reyburn *et al.* [7]. An upper bound of 95% for this distribution was assumed.
- 7- Minimum and maximum values of the triangular distributions were calculated as  $\pm 25\%$  the mode of the distribution.
- 8- Minimum is obtained by considering only the price of test (excluding labor), as reported by Harchut *et al.* [8]. Maximum value is taken from White *et al.* [9].
- 9- Minimum value is the negotiated WHO/Novartis price, excluding adjustments for wastage and transport. Maximum value corresponds to the price reported in the AFRO essential drug price indicator.
- 10- Minimum and maximum values as reported by Lubell *et al.* [10].
- 11- Minimum is reported by Somi *et al.* [11] and maximum by Sicuri *et al.* [12].
- 12- Minimum and maximum values correspond to the interquartile range reported by Tougher *et al.* [13].
- 13- Minimum and maximum values correspond to the 95% confidence interval reported by Yukich *et al.* [14].
- 14- Values for this triangular distribution are taken from the review of Chima *et al.* [15]. For children aged 10-14 years of aged, it was assumed that it would correspond to 20-30% of an adult illness time.
- 15- Minimum value taken by reducing by 50% the estimate of 5% loss in earning. Maximum value corresponds to a situation where 20% of workers in Dar es Salaam are involved in manual work where lost in earnings is estimated at 17% [16].
- 16- A uniform distribution was used to acknowledge the fact that prior information on this parameter is uncertain. The minimum and maximum values correspond to the authors' evaluation of a plausible conservative range.
- 17- Minimum value reported by Ngalula *et al.* [17] and maximum value by Dercon *et al.* [18].

## REFERENCES

1. Maheu-Giroux M, Castro M: **Impact of community-based larviciding on the prevalence of malaria infection in Dar es Salaam, Tanzania.** *PLOS One* 2013, **8**:e71638.
2. Salomon JA, Vos T, Hogan DR, Gagnon M, Naghavi M, Mokdad A, Begum N, Shah R, Karyana M, Kosen S, et al: **Common values in assessing health outcomes from disease and injury: disability weights measurement study for the Global Burden of Disease Study 2010.** *Lancet* 2012, **380**:2129-2143.
3. Lim S, Murray C, Rosenfeld L: **GBD 2010 Estimation Strategy Report for Malaria. (Unpublished Document; Personal Communication 2013).** pp. 305: Institute for Health Metrics and Evaluation; 2012:305.
4. Price RN, Simpson JA, Nosten F, Luxemburger C, Hkirjaroen L, ter Kuile F, Chongsuphajaisiddhi T, White NJ: **Factors contributing to anaemia after uncomplicated falciparum malaria.** *Am J Trop Med Hyg* 2001, **65**:614-622.
5. Doherty CP, Cox SE, Fulford AJ, Austin S, Hilmers DC, Abrams SA, Prentice AM: **Iron incorporation and post-malaria anaemia.** *PLoS One* 2008, **3**:e2133.
6. Sowunmi A, Gbotosho GO, Happi CT, Fateye BA: **Factors contributing to anaemia after uncomplicated Plasmodium falciparum malaria in children.** *Acta Trop* 2010, **113**:155-161.
7. Reyburn H, Mbatia R, Drakeley C, Bruce J, Carneiro I, Olomi R, Cox J, Nkya WM, Lemnge M, Greenwood BM, Riley EM: **Association of transmission intensity and age with clinical manifestations and case fatality of severe Plasmodium falciparum malaria.** *JAMA* 2005, **293**:1461-1470.
8. Harchut K, Standley C, Dobson A, Klaassen B, Rambaud-Althaus C, Althaus F, Nowak K: **Over-diagnosis of malaria by microscopy in the Kilombero Valley, Southern Tanzania: an evaluation of the utility and cost-effectiveness of rapid diagnostic tests.** *Malar J* 2013, **12**:159.
9. White MT, Conteh L, Cibulskis R, Ghani AC: **Costs and cost-effectiveness of malaria control interventions--a systematic review.** *Malar J* 2011, **10**:337.
10. Lubell Y, Riewpaiboon A, Dondorp AM, von Seidlein L, Mokuolu OA, Nansumba M, Gesase S, Kent A, Mtove G, Olaosebikan R, et al: **Cost-effectiveness of parenteral artesunate for treating children with severe malaria in sub-Saharan Africa.** *Bull World Health Organ* 2011, **89**:504-512.
11. Somi MF, Butler JR, Vahid F, Njau JD, Kachur SP, Abdulla S: **Economic burden of malaria in rural Tanzania: variations by socioeconomic status and season.** *Trop Med Int Health* 2007, **12**:1139-1147.

12. Sicuri E, Vieta A, Lindner L, Constenla D, Sauboin C: **The economic costs of malaria in children in three sub-Saharan countries: Ghana, Tanzania and Kenya.** *Malar J* 2013, **12**:307.
13. Tougher S, Ye Y, Amuasi JH, Kourgueni IA, Thomson R, Goodman C, Mann AG, Ren R, Willey BA, Adegoke CA, et al: **Effect of the Affordable Medicines Facility--malaria (AMFm) on the availability, price, and market share of quality-assured artemisinin-based combination therapies in seven countries: a before-and-after analysis of outlet survey data.** *Lancet* 2012, **380**:1916-1926.
14. Yukich J, D'Acremont V, Kahama J, Swai N, Lengeler C: **Cost savings with rapid diagnostic tests for malaria in low-transmission areas: evidence from Dar es Salaam, Tanzania.** *Am J Trop Med Hyg* 2010, **83**:61-68.
15. Chima RI, Goodman CA, Mills A: **The economic impact of malaria in Africa: a critical review of the evidence.** *Health Policy* 2003, **63**:17-36.
16. Horton S, Ross J: **The economics of iron deficiency.** *Food Policy* 2003, **28**:51-75.
17. Ngalula J, Urassa M, Mwaluko G, Isingo R, Ties Boerma J: **Health service use and household expenditure during terminal illness due to AIDS in rural Tanzania.** *Trop Med Int Health* 2002, **7**:873-877.
18. Dercon S, De Weerd J, Bold T, Pankhurst A: **Group-based funeral insurance in Ethiopia and Tanzania.** *World Development* 2006, **34**:685-703.
